# Supplementary material for: Genome-Wide Identification, and Molecular Evolution of The Magnesium Transporter (MGT) Gene Family in <em>Citrullus Lanatus</em> and <em>Cucumis Sativus</em>
Source: Preprints.org preprint supplement (doi:10.20944/preprints202206.0278.v1), 2022-06-21
Supplement: Supplementary file 1 [file supplementary]

## Sheet: Watermelon
Protein ID	Binding site
Cla97C02G026470	P106	V107	F108	S109	H110	S111	S112	H124	L125	E126	F127	P142	L143	R144	E146	V147	F150	V206	Y209	L210	R253	V254	K256	V257	L341
Cla97C01G012970	F167	L168	S171	M172	P173	N185	L186	G187	S188	R190	Y203	R205	G207	G208	F211	R244	R247	L248	Q250	R251	E287	L288	R291	A292	L295
Cla97C11G215350	A33	R59	T79	M80	G83	E84	N87	G103	S106	E155	D158	L159	L171	I173	A174	Q246	I247	L250	A253	L254	F257	T259	V261	V262	S263	T265	Y266	F270
Cla97C09G173030	S23	S24	I27	S29	S30	F31	I32	I33	K34	G37	L38	A41	A43	S46	R47	S49	S50	T67	M68	G71	E72	N75	F76	Y79	Y81	A82	P83	A84	I85	L86	T88	P89	L90	G91	A92	I93	S94	I95	S98	C121	V122	S125	T126	I128	V129	L130	A131	R135	T136
Cla97C11G219270	K37	K39	G40	K42	K43	A44	G45	A46	G48	I49	G52	G55	F56	L59	I206	A207	M208	K209	T211	S213	F218	Q222	T223	W224	F226	A227	I228	V230	T231
Cla97C06G117720	L13	A14	S17	F20	I21	S24	T25	K28	A37	A38	R41	A42	S44	G45	S48	M59	L62	I63	E66	S88	I89	S92	I155	V156	V158	A159	I162	M184	L187	T188	S191	V192	V221	C224	C225	I226	Q228	V229	Y231	L232	N233	K234	A235	L236	F239	S241	V243	I244	S245
Cla97C05G099300	P4	I5	T8	L9	A12	M54	D55	I56	G58	A59	M62	L63	L66	L145	G148	W149	F152	Y153	Q156	L175	I208	S211	I212	C214	S215	A216	G218	F219	Q222	T223	L226
Cla97C02G031120	I20	K27	R40	V43	T60	M61	G64	E65	N68	Y72	T81	G84	A85	S87	L147	I150	A151	A154	V157	L158	V224	Q227	L228	L231	Y247	F251
Cla97C05G083800	M54	W56	A57	G58	I60	S61	M62	I162	V163	Y165	V166	Y169	T172	V176	Y177	I180	V229	L232	N233	L236
Cla97C05G094240	F65	G68	N69	N72	Q81	L84	A85	G88	S89	Q91	F92	N95	N122	V126	K144	I158	V161	A162	L163	H165	S166	F238	T241	A242	W245	M246	A247	A258	I261	V262	Q266	T270
Cla97C07G128920	P74	L75	L76	S77	Y78	P79	S80	N92	E94	H95	K97	D112	V115	I168	F171	L172	R175	E178	L179	A208	R211	L212	R215	V216	K218	V219	I297
Cla97C05G091770	I31	S34	F35	K38	K39	L42	R51	T71	M72	G75	E76	N79	F80	Y83	A88	L158	A162	M165	C234	V235	Q238	M239	L242
Cla97C02G033950	Y26	L27	P28	N31	V32	K41	T43	G44	V45	P47	L78	R79	L81	D82	P83	L84	L85	S86	Y87	S89	N101	L102	E103	H104	N118	A119	R120	D121	P122	S123	V124	F127	C220	L221	E224	R264	K267	V268
Cla97C10G195750	P88	L89	F90	V91	Y92	S94	N106	L107	E108	Q109	R111	S124	D126	Y128	V129	Y132	A194	C195	F197	L198	Q201	E204	L205	R234	A237	L238	R241	V242	K244	V245	I346
Cla97C03G058370	K186	P191	I192	W193	W194	H196	S273	L280	T282	N292	I298	T299	V301	Q302	L304	P313	R314	V319	I320	L323
Cla97C05G091810	K63	A65	G66	A68	R69	L70	L101	R102	G105	P106	V107	F108	S109	H110	S111	S112	E126	F127	K129	L140	D141	P142	L143	R144	E146	V147	F150	Y209	R253	K256
Cla97C10G192820	Q96	I102	C106	P107	L109	V127	A130	L131	V132	R134	S162	L163	G164	R165	V166	F171	P173
Cla97C06G116190	R56	D57	R59	I60	D62	P63	L64	L65	S66	Y67	P68	S69	T70	I71	N81	L82	E83	H84	K86	P99	T100	D101	H103	V104	V107	L156	I159	C160	F162	L163	R166	E169	L170	A199	R202	L203	R206	V207	K209	V210	E213	L214	Y286	I290
Cla97C08G153300	P52	L53	F54	L55	C56	P57	S58	S70	L71	E72	Q73	R75	S88	L89	D90	A93	L131	Q135	Q175	K178	V179
Cla97C03G063010	S17	S18	I21	F25	K28	K29	L32	R33	A35	A36	A37	G40	V41	A43	G44	V45	I58	G59	M60	I62	M63	G66	E67	N70	Y74	A79	V80	V82	T83	G86	A87	S89	I90	I123	V124	A127	I156	F160	A163	I164	A167	C170	T173	V177	F178	G180	I181	L184	M185
[truncated: 39 more columns]

## Sheet: Cucumis
Protein ID	Binding site
Csa_3G228350	I31	S34	F35	K38	K39	L42	K43	A45	G46	A47	R51	M72	G75	E76	N79	F80	Y83	T92	G95	A96	S98	M165	F169	F173	C234	V235	Q238	M239	M261	F262	F265
Csa_2G122000	Y75	P77	L80	T82	P83	L84	G85	A86	L87	S88	S119	T120	I122	V123	L124	H125	E133	S134	V135	K136	E137	V138	W139	L141	E144	P145	L148	V149	F152	Y248	Y249	F252	T253	T254	I285
Csa_7G291140	E172	Q177	T178	N179	I180	D243	T244
Csa_2G402060	A53	S56	G57	A62	G63	Y65	S66	L68	L72	W73	V75	G76	T79	M80	L177	I180	I181	V184	Y187	T190	Y191	V192	M193	V194	Y195	I195	G196	V197	M247	L250	N251	L254	D255
Csa_7G009750	S16	S17	I20	S23	F24	L25	K26	G29	L30	A33	G34	A35	A38	R39	V42	M61	G64	E65	N68	Y72	V80	T81	G84	A85	S87	I88	A154	S155	L158	M161	L162	L215	F216	V219	C223	V224	Q227	L228	L231	Y247	Y248	M250	F251	L254
Csa_3G251940	T57	W58	G61	I62	F65	I66	N70	C71	F74	H165	Y168	R169	E172	L173	M188	P191	F192	A195	I196	G199	A200	G202	S203	S205	V206	A209	K210	S213	L237	S240	T241	F244	W245
Csa_1G627400	G10	V11	A14	I62	M63	G66	E67	N70	F71	L150	G153	S154	V157	L158	V222	V223	V226	Q229	M230	L233
Csa_2G225310	P72	L73	L74	S75	Y76	P77	S78	N90	E92	H93	D110	V113	I166	F169	L170	R173	E176	L177	A206	R209	L210	R213	V214	K216	V217	I295
Csa_6G366510	P52	L53	F54	L55	C56	P57	S58	S70	L71	E72	Q73	R75	S88	L89	D90	A93	L131	Q135	Q175	K178	V179
Csa_4G646200	Q75	P76	S78	G79	G81	L82	L85	T112	I113	V115	G116	W149	L150	Y153	Q222	V234	S235	T236	A239	V240	I243	I275
Csa_3G710800	F90	V91	Y92	P93	S94	N106	L107	E108	R111	A194	C195	F197	L198	Q201	L205	R234	A237	L238	R241	V242	K244	V245	I346
Csa_1G138280	F21	T23	N24	S25	M26	P27	N39	L40	G41	S42	R44	R59	G61	G62	F65	R98	R101	L102	Q104	R105	K108	V109	R112	S135	T138	E141	L142	S144	R145	A146	A148	L149
Csa_5G586580	S27	S28	I31	S34	F35	V37	K38	K40	G41	L42	K43	K44	A45	G46	A47	G49	A54	G55	F57	T58	L60	L64	W65	L67	G68	T71	M72	I73	E75	I76	N78	F79	V80	Y82	A83	F84	A87	L88	V90	T91	G94	A95	S97	I98	S128	I131	V132	A135	P136
Csa_3G129750	T40	R41	S44	G45	S48	W55	G58	M59	S61	M62	I63	V64	G65	E66	A68	N69	S88	I89	S92	A93	C112	C115	Y150	L151	V154	L155	V156	V158	V159	L161	I162	Y165	I180	C181	M184	L187	T188	S191	S225	I226	V229	L232	N233	T241	A242	S245	P246	V247	Y249
Csa_4G179670	P123	F124	R134	T146	F147	R148	I149	I235	I236	H239	M240	L243	V291	I292	G295	V298	F299	L327
Csa_7G070800	R39	K41	G42	V45	R46	P47	D82	P83	L84	L85	S86	Y87	S89	N101	L102	E103	H104	L117	N118	A119	R120	D121	P122	S123	V124	F127	C219	L220	E223	R263	K265	V266
Csa_3G225330	P106	V107	F108	S109	H110	S111	S112	N124	L125	E126	F127	P142	L143	R144	E146	V147	F150	V206	Y209	L210	R253	V254	K256	V257	L342
Csa_1G453990	E133	E135	W136	A137	D154	L155	V156	A157	W168	C170	V172	W182	L183	A186	H187	L189	I256
Csa_2G199910	P63	L64	L65	S66	Y67	P68	S69	I71	L82	E83	H84	D101	H103	V104	V107	L157	I160	C161	F163	L164	R167	E170	L171	A200	R203	L204	R207	V208	K210	V211	E214	L215	Y287	I291
[truncated: 48 more columns]
