# Supplementary material for: Genome-Wide Identification, and Molecular Evolution of The Magnesium Transporter (MGT) Gene Family in <em>Citrullus Lanatus</em> and <em>Cucumis Sativus</em>
Source: Preprints.org preprint supplement (doi:10.20944/preprints202206.0278.v1), 2022-06-21
Supplement: Supplementary file 2 [file Table S1.xlsx]

## Sheet: Watermelon
Gene ID	Gene name	Length (aa)	Class	Exon	location	MW	PI	Gravy	Stability
Cla97C02G031120.1	NIPA-1	333	NIPA	9	Chromosome 2: 4,056,051-4,058,718 reverse strand.	38200.3	7.21	0.655	unstable
Cla97C03G063010.1	NIPA-2	347	NIPA	9	Chromosome 3: 25,171,260-25,177,450 reverse strand.	37998.1	7.66	0.773	stable
Cla97C05G083800.1	NIPA-3	323	NIPA	8	Chromosome 5: 2,899,390-2,905,841 forward strand.	35440.8	8.48	0.69	stable
Cla97C05G091770.1	NIPA-4	346	NIPA	9	Chromosome 5: 9,780,458-9,791,884 forward strand	38160.1	8.16	0.643	stable
Cla97C05G094240.1	NIPA-5	443	NIPA	13	Chromosome 5: 15,169,362-15,173,663	49659.1	7.76	0.487	stable
Cla97C05G099300.1	NIPA-6	345	NIPA	9	Chromosome 5: 28,397,479-28,400,044 reverse strand.	38120.5	9.32	0.699	unstable
Cla97C06G117720.1	NIPA-7	327	NIPA	8	Chromosome 6: 10,156,289-10,161,780	36382	8.79	0.653	stable
Cla97C09G173030.1	NIPA-8	353	NIPA	9	Chromosome 9: 9,636,462-9,643,894 forward strand.	39041.8	5.97	0.631	stable
Cla97C11G215350.1	NIPA-9	350	NIPA	9	Chromosome 11: 11,834,901-11,840,897 forward strand.	38483.5	8.12	0.686	stable
Cla97C11G219270.1	NIPA-10	345	NIPA	9	Chromosome 11: 25,439,945-25,443,356 forward strand.	38200.3	7.21	0.655	unstable
Cla97C03G058370.1	CorA-1	548	CorA-like	9	Chromosome 3: 7,714,267-7,720,532 reverse strand.	62780	5.82	-0.205	unstable
Cla97C10G192820.1	CorA-2	467	CorA-like	5	Chromosome 10: 20,744,450-20,747,676 reverse strand.	53552.9	8.78	-0.187	unstable
Cla97C01G012970.1	MRS2-1	456	MRS2	13	Chromosome 1: 26,748,179-26,756,354 reverse strand.	51335.1	5.03	-0.034	unstable
Cla97C02G026470.1	MRS2-2	389	MRS2	4	Chromosome 2: 247,805-252,593 reverse strand.	43862.9	6.06	-0.307	unstable
Cla97C02G033950.1	MRS2-3	495	MRS2	6	Chromosome 2: 7,669,323-7,673,949 reverse strand.	55500.7	4.86	-0.347	unstable
Cla97C05G091810.1	MRS2-4	442	MRS2	4	Chromosome 5: 9,822,994-9,828,911 reverse strand.	49595.8	5.89	-0.159	unstable
Cla97C06G116190.1	MRS2-5	392	MRS2	11	Chromosome 6: 7,319,635-7,324,047 forward strand.	44525.7	4.97	-0.159	stable
Cla97C07G128920.1	MRS2-6	399	MRS2	11	Chromosome 7: 608,611-612,914 forward strand.	45744.1	4.96	-0.263	unstable
Cla97C08G153300.1	MRS2-7	380	MRS2	7	Chromosome 8: 21,523,697-21,527,358 reverse strand.	43474.4	5.12	-0.011	stable
Cla97C10G195750.1	MRS2-8	447	MRS2	5	Chromosome 10: 25,257,356-25,260,568 forward strand.	51223.8	5.13	-0.1	unstable

## Sheet: cucumis
Gene ID	Gene name	Length	Class	Exon	location	MW	PI	Gravy	Stability
Csa_1G627400	NIPA-1	348	NIPA	9	Chromosome 01: 24,608,187-24,615,485	37948.8	7.12	0.75	stable
Csa_2G122000	NIPA-2	326	NIPA	8	Chromosome 02: 8,144,733-8,151,191	36087.8	8.94	0.686	stable
Csa_2G402060	NIPA-3	305	NIPA	9	Chromosome 02: 20,602,689-20,608,043	38406.4	8.62	0.67	stable
Csa_3G129750	NIPA-4	323	NIPA	8	Chromosome 03: 8,391,425-8,396,221	36278.7	6.17	0.714	stable
Csa_3G228350	NIPA-5	346	NIPA	9	Chromosome 03: 14,882,423-14,894,606	38078	8.48	0.612	stable
Csa_3G251940	NIPA-6	333	NIPA	12	Chromosome 03: 15,665,582-15,671,493	37245.5	9.47	0.453	stable
Csa_4G646200	NIPA-7	344	NIPA	9	Chromosome 04: 22,005,687-22,008,883	38071.4	9.63	0.664	unstable
Csa_5G586580	NIPA-8	317	NIPA	8	Chromosome 05: 20,972,694-20,975,947	34890.6	6.64	0.866	stable
Csa_7G009750	NIPA-9	333	NIPA	9	Chromosome 07: 626,065-629,413	35348.6	8.53	0.679	stable
Csa_7G291140	NIPA-10	353	NIPA	9	Chromosome 07: 10,243,740-10,250,275	38970.7	5.97	0.631	stable
Csa_1G453990	CorA-1	547	CorA-like	7	Chromosome 01: 16,479,730-16,485,907	62889.8	6.05	-0.317	unstable
Csa_4G179670	CorA-2	567	CorA-like	4	Chromosome 04: 8,971,424-8,974,694	53282.5	8.84	-0.174	unstable
Csa_1G138280	MSR2-1	310	MRS2	12	Chromosome 01: 9,583,230-9,597,539	35554.6	5.6	0.065	unstable
Csa_2G199910	MSR2-2	393	MRS2	11	Chromosome 02: 10,463,153-10,468,044	44429.5	4.96	-0.164	unstable
Csa_2G225310	MSR2-3	397	MRS2	11	Chromosome 02: 10,938,899-10,945,499	45537.8	4.97	-0.277	stable
Csa_3G225330	MSR2-4	443	MRS2	4	Chromosome 03: 14,799,591-14,816,906	49570.7	6.13	-0.194	unstable
Csa_3G710800	MSR2-5	447	MRS2	5	Chromosome 03: 26,903,221-26,906,820	51130.7	5.19	-0.11	unstable
Csa_6G366510	MSR2-6	380	MRS2	7	Chromosome 06: 16,752,600-16,756,652	43289.9	5.05	-0.017	unstable
Csa_7G070800	MSR2-7	494	MRS2	6	Chromosome 07: 4,426,120-4,430,139	55179.2	4.87	-0.382	unstable

## Sheet: melon
Gene ID	Gene name	Length (aa)	Class	Exon	location	MW	PI	Gravy	Stability
MELO3C023646	NIPA-1	353	NIPA	9	Chromosome 01 : 7975226 .. 7982707 (-)	39378.3	5.68	0.639	stable
MELO3C013374	NIPA-2	333	NIPA	10	Chromosome 01 : 17046957 .. 17051180 (-)	36668.3	5.97	0.723	stable
MELO3C015137	NIPA-3	274	NIPA	7	Chromosome 02 : 7465573 .. 7472084 (+)	30470.9	9.04	1.076	stable
MELO3C029510	NIPA-4	235	NIPA	8	Chromosome 02 : 7472628 .. 7475640 (+)	27030.7	7.61	-0.316	unstable
MELO3C008116	NIPA-5	350	NIPA	9	Chromosome 03 : 697312 .. 708565 (+)	38728.9	8.41	0.691	stable
MELO3C020352	NIPA-6	296	NIPA	7	Chromosome 05 : 10777886 .. 10794767 (-)	33229.3	8.83	0.618	stable
MELO3C006298	NIPA-7	323	NIPA	8	Chromosome 06 : 2333398 .. 2338596 (+)	35650	8.21	0.669	stable
MELO3C019426	NIPA-8	356	NIPA	9	Chromosome 06 : 10615628 .. 10630587 (+)	39681	8.07	0.613	stable
MELO3C014760	NIPA-9	408	NIPA	13	Chromosome 06 : 18894346 .. 18900585 (-)	46145.9	6.6	0.491	stable
MELO3C016882	NIPA-10	332	NIPA	10	Chromosome 07 : 1436887 .. 1440753 (+)	37120.3	9.47	0.655	unstable
MELO3C011827	NIPA-11	345	NIPA	9	Chromosome 10 : 4515346 .. 4518998 (-)	38412.5	6.17	0.65	stable
MELO3C018046.2	CorA-1	456	CorA-like	4	Chromosome 07 : 28842934 .. 28846786 (-)	52514.6	7.63	-0.175	unstable
MELO3C002711.2	CorA-2	546	CorA-like	8	Chromosome 12 : 21781096 .. 21797537 (-)	63232.4	5.95	-0.298	unstable
MELO3C018529.2	MRS2-1	495	MRS2	6	Chromosome 01 : 920570 .. 924742 (-)	55762.9	4.88	-0.395	unstable
MELO3C011418.2	MRS2-2	194	MRS2	3	Chromosome 03 : 23868761 .. 23869957 (-)	22525	4.6	0.196	unstable
MELO3C026733.2	MRS2-3	447	MRS2	6	Chromosome 04 : 24894574 .. 24898019 (+)	51542.2	5.13	-0.112	unstable
MELO3C014309.2	MRS2-4	328	MRS2	8	Chromosome 05 : 3995694 .. 4000924 (+)	38093.2	4.81	-0.454	stable
MELO3C026764.2	MRS2-5	173	MRS2	4	Chromosome 05 : 4961846 .. 4963924 (+)	20175	4.94	-0.274	unstable
MELO3C019432.2	MRS2-6	443	MRS2	5	Chromosome 06 : 9599127 .. 9605480 (-)	49867.1	5.71	-0.195	unstable
MELO3C004840.2	MRS2-7	459	MRS2	14	Chromosome 12 : 9071515 .. 9073862 (-)	52057.9	5.13	-0.044	unstable
		173	0	3	0	20175	4.6	-0.454	0
		546	0	14	0	63232.4	9.47	1.076	0
