# Supplementary material for: Genome-Wide Identification, and Molecular Evolution of The Magnesium Transporter (MGT) Gene Family in <em>Citrullus Lanatus</em> and <em>Cucumis Sativus</em>
Source: Preprints.org preprint supplement (doi:10.20944/preprints202206.0278.v1), 2022-06-21
Supplement: Supplementary file 4 [file Table S3.xlsx]

## Sheet: Watermelon
Element	ABRE	ARE	Box 4	CAT-box	G-box	GARE-motif	HD-Zip 3	MRE	MYB	TCA	W box	WUN-motif	TGACG-motif	TGA-element	MBS	P-box	AT-rich sequence	AuxRR-core	GC-motif	LTR	TC-rich repeats	circadian
Gene	abscisic acid responsiveness	essential for the anaerobic induction	light responsiveness	related to meristem expression	light responsiveness	gibberellin-responsive element	protein binding site	MYB binding site involved in light responsiveness	stress responsive	salicylic acid responsiveness	WORKY binding site involved in drought-inducibility	wonding responsiveness	involved in the MeJA-responsiveness	auxin-responsive element	MYB binding site involved in drought-inducibility	gibberellin-responsive element	maximal elicitor-mediated activation	involved in auxin responsiveness	involved in anoxic specific inducibility	involved in low-temperature responsiveness	involved in defense and stress responsiveness	involved in circadian control
Cla97C02G031120.1	2	1	1	0	1	0	0	1	2	1	0	0	1	0	0	0	0	0	0	0	0	0
Cla97C03G063010.1	1	2	5	1	2	0	0	1	5	0	0	1	3	0	0	0	0	0	0	0	0	0
Cla97C05G083800.1	2	1	0	1	2	0	0	0	0	0	1	2	1	2	0	0	0	0	0	0	0	0
Cla97C05G091770.1	0	3	4	0	0	0	0	0	2	1	1	0	0	0	0	0	0	0	0	0	1	0
Cla97C05G094240.1	1	0	2	0	3	0	0	1	0	1	3	1	1	1	2	2	0	0	1	1	0	0
Cla97C05G099300.1	3	5	1	0	2	0	0	1	3	0	0	1	0	1	0	0	1	0	0	2	0	1
Cla97C06G117720.1	1	0	2	0	0	0	0	0	1	0	1	0	1	0	1	0	0	0	1	3	0	0
Cla97C09G173030.1	0	1	0	0	0	0	0	0	5	0	0	0	1	0	0	0	0	0	0	1	0	0
Cla97C11G215350.1	0	1	1	0	0	0	0	0	1	0	0	2	1	2	0	0	0	0	0	0	0	0
Cla97C11G219270.1	0	0	3	1	0	0	0	0	5	1	1	1	0	0	0	0	0	0	0	0	1	0
Cla97C03G058370.1	1	1	2	1	1	0	0	1	3	1	0	0	0	0	0	0	0	0	0	2	0	0
Cla97C10G192820.1	3	4	1	0	3	0	0	0	8	0	0	2	0	0	0	0	0	0	1	0	0	0
Cla97C01G012970.1	1	1	2	0	1	0	0	0	1	0	3	1	1	0	0	0	0	0	0	0	0	0
Cla97C02G026470.1	0	3	0	0	0	0	0	0	3	0	0	0	1	0	1	0	0	0	0	0	0	0
Cla97C02G033950.1	3	0	0	0	3	0	0	0	1	0	2	0	1	0	1	1	0	0	0	0	0	0
Cla97C05G091810.1	1	1	0	0	1	0	0	1	1	0	0	0	2	0	0	0	0	0	0	0	1	0
Cla97C06G116190.1	0	1	9	0	1	0	1	0	0	2	0	1	0	0	0	0	0	0	0	0	0	1
Cla97C07G128920.1	0	6	0	0	0	0	0	1	4	0	0	2	1	1	0	2	0	0	0	1	1	0
Cla97C08G153300.1	2	3	3	0	1	0	0	2	3	0	0	0	2	1	0	0	0	0	0	1	0	0
Cla97C10G195750.1	1	1	2	0	1	1	0	1	3	1	0	1	0	1	0	0	1	0	0	0	1	1

## Sheet: Cucumber
Element	ABRE	ARE	Box 4	CAT-box	G-box	GARE-motif	HD-Zip 3	MRE	MYB	TCA	W box	WUN-motif	TGACG-motif	TGA-element	MBS	P-box	AT-rich sequence	AuxRR-core	GC-motif	LTR	TC-rich repeats	circadian
Gene	abscisic acid responsiveness	essential for the anaerobic induction	light responsiveness	related to meristem expression	light responsiveness	gibberellin-responsive element	protein binding site	MYB binding site involved in light responsiveness	stress responsive	salicylic acid responsiveness	WORKY binding site involved in drought-inducibility	wonding responsiveness	involved in the MeJA-responsiveness	auxin-responsive element	MYB binding site involved in drought-inducibility	gibberellin-responsive element	maximal elicitor-mediated activation	involved in auxin responsiveness	involved in anoxic specific inducibility	involved in low-temperature responsiveness	involved in defense and stress responsiveness	involved in circadian control
Csa_1G627400	0	0	4	1	0	0	0	0	4	0	0	0	0	0	1	0	0	0	0	0	0	0
Csa_2G122000	1	3	2	0	2	0	0	2	2	0	0	0	1	0	0	1	0	0	0	0	0	0
Csa_2G402060	0	2	0	0	0	0	0	1	2	0	1	2	2	0	0	0	0	0	0	0	0	0
Csa_3G129750	2	2	2	0	1	0	0	2	1	0	2	1	0	0	0	0	0	0	0	1	3	0
Csa_3G228350	0	3	1	0	0	0	0	0	2	1	1	0	1	0	0	0	0	0	0	0	0	0
Csa_3G251940	1	0	0	0	1	1	0	1	1	0	1	0	0	1	0	2	0	0	0	2	0	0
Csa_4G646200	5	1	3	1	4	2	0	0	3	1	1	1	1	1	0	0	1	0	0	1	1	0
Csa_5G586580	4	4	1	0	2	0	0	0	1	0	0	1	0	0	0	0	0	0	0	0	0	0
Csa_7G009750	2	1	1	1	0	0	0	2	3	1	1	0	0	0	0	1	0	0	0	0	0	1
Csa_7G291140	1	1	1	0	2	0	0	1	4	1	0	0	2	0	1	1	0	0	0	0	0	0
Csa_1G453990	0	1	2	0	0	0	0	0	1	1	0	0	0	1	0	0	0	1	0	1	0	0
Csa_4G179670	4	0	1	0	3	0	0	0	7	0	0	3	1	0	1	0	0	0	0	0	0	0
Csa_1G138280	0	2	1	0	0	0	0	0	0	0	2	2	0	0	0	0	0	0	0	0	2	1
Csa_2G199910	0	2	8	0	0	0	0	2	5	0	1	2	0	0	0	0	0	0	0	0	0	0
Csa_2G225310	4	2	0	0	2	0	0	1	4	1	0	0	0	1	2	1	0	0	0	0	0	0
Csa_3G225330	0	0	3	0	1	0	1	1	1	0	1	2	0	0	0	0	0	0	0	0	0	0
Csa_3G710800	5	0	1	0	5	0	0	3	1	0	0	0	2	2	0	0	0	0	0	0	0	1
Csa_6G366510	1	0	0	0	1	0	0	1	2	1	1	0	0	2	0	0	0	0	0	0	0	0
Csa_7G070800	0	2	2	0	0	0	0	0	2	1	0	1	1	0	1	0	0	0	0	0	1	0
